# Supplementary material for: Aberrant CBFA2T3B gene promoter methylation in breast tumors
Source: PubMed Central journal article supplement (PMC516017; doi:10.1186/1476-4598-3-22), 2004-08-10
Supplement: 1476-4598-3-22-S1.pdf [file 1476-4598-3-22-S1.pdf]

**Additional file 1. Real-time RT-PCR demonstrating low abundance mRNA inherent to CBFA2T3 transcripts**

Fluorescence intensity

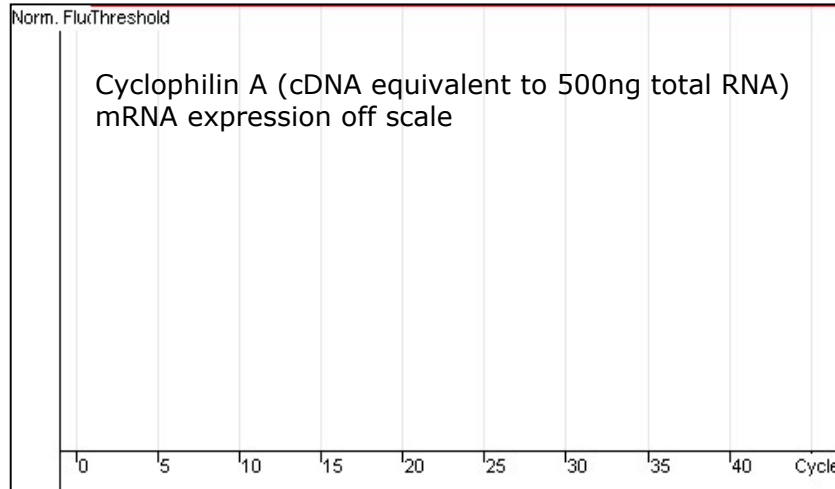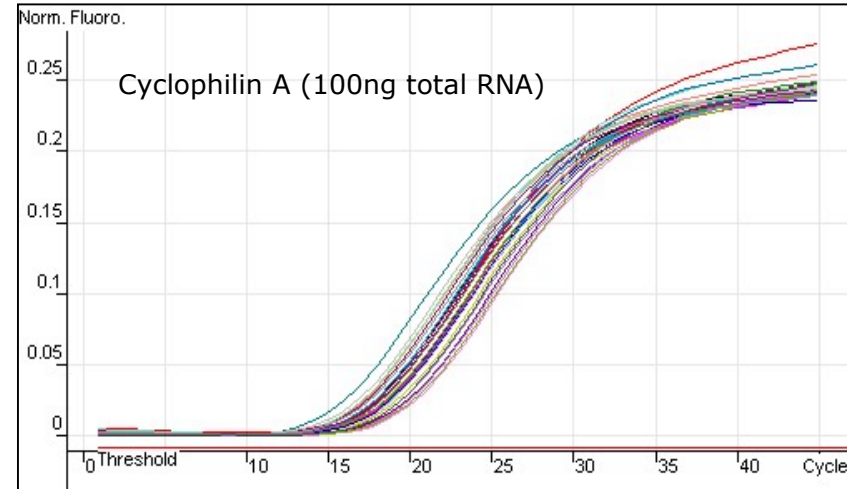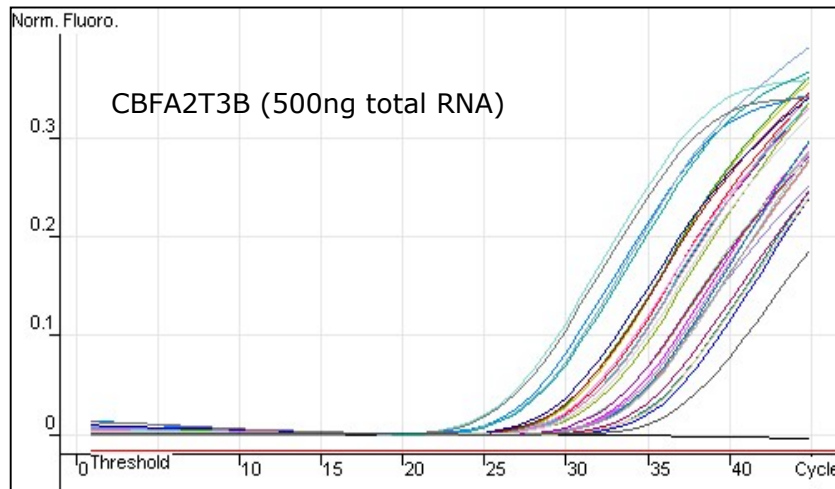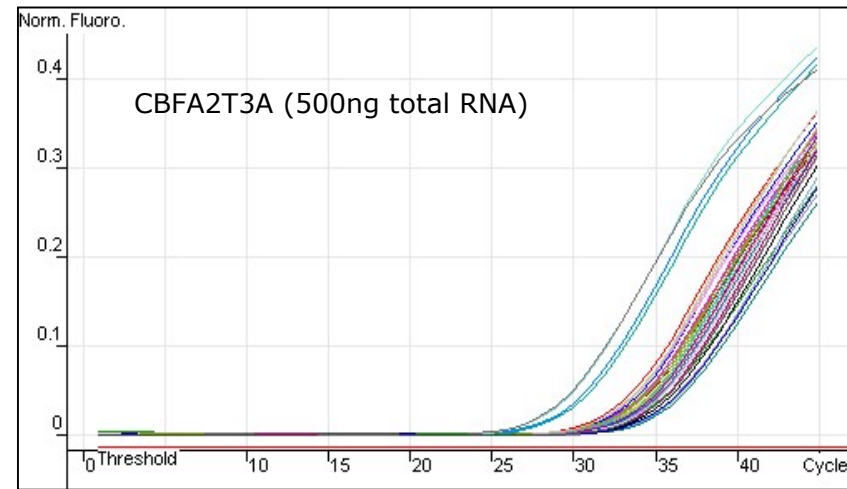

Cycle number
