# Supplementary material for: Aberrant CBFA2T3B gene promoter methylation in breast tumors
Source: PubMed Central journal article supplement (PMC516017; doi:10.1186/1476-4598-3-22), 2004-08-10

**Additional file 3. Real-time MSP demonstrating aberrant CBFA2T3B promoter CpG methylation in breast tumor cell lines**

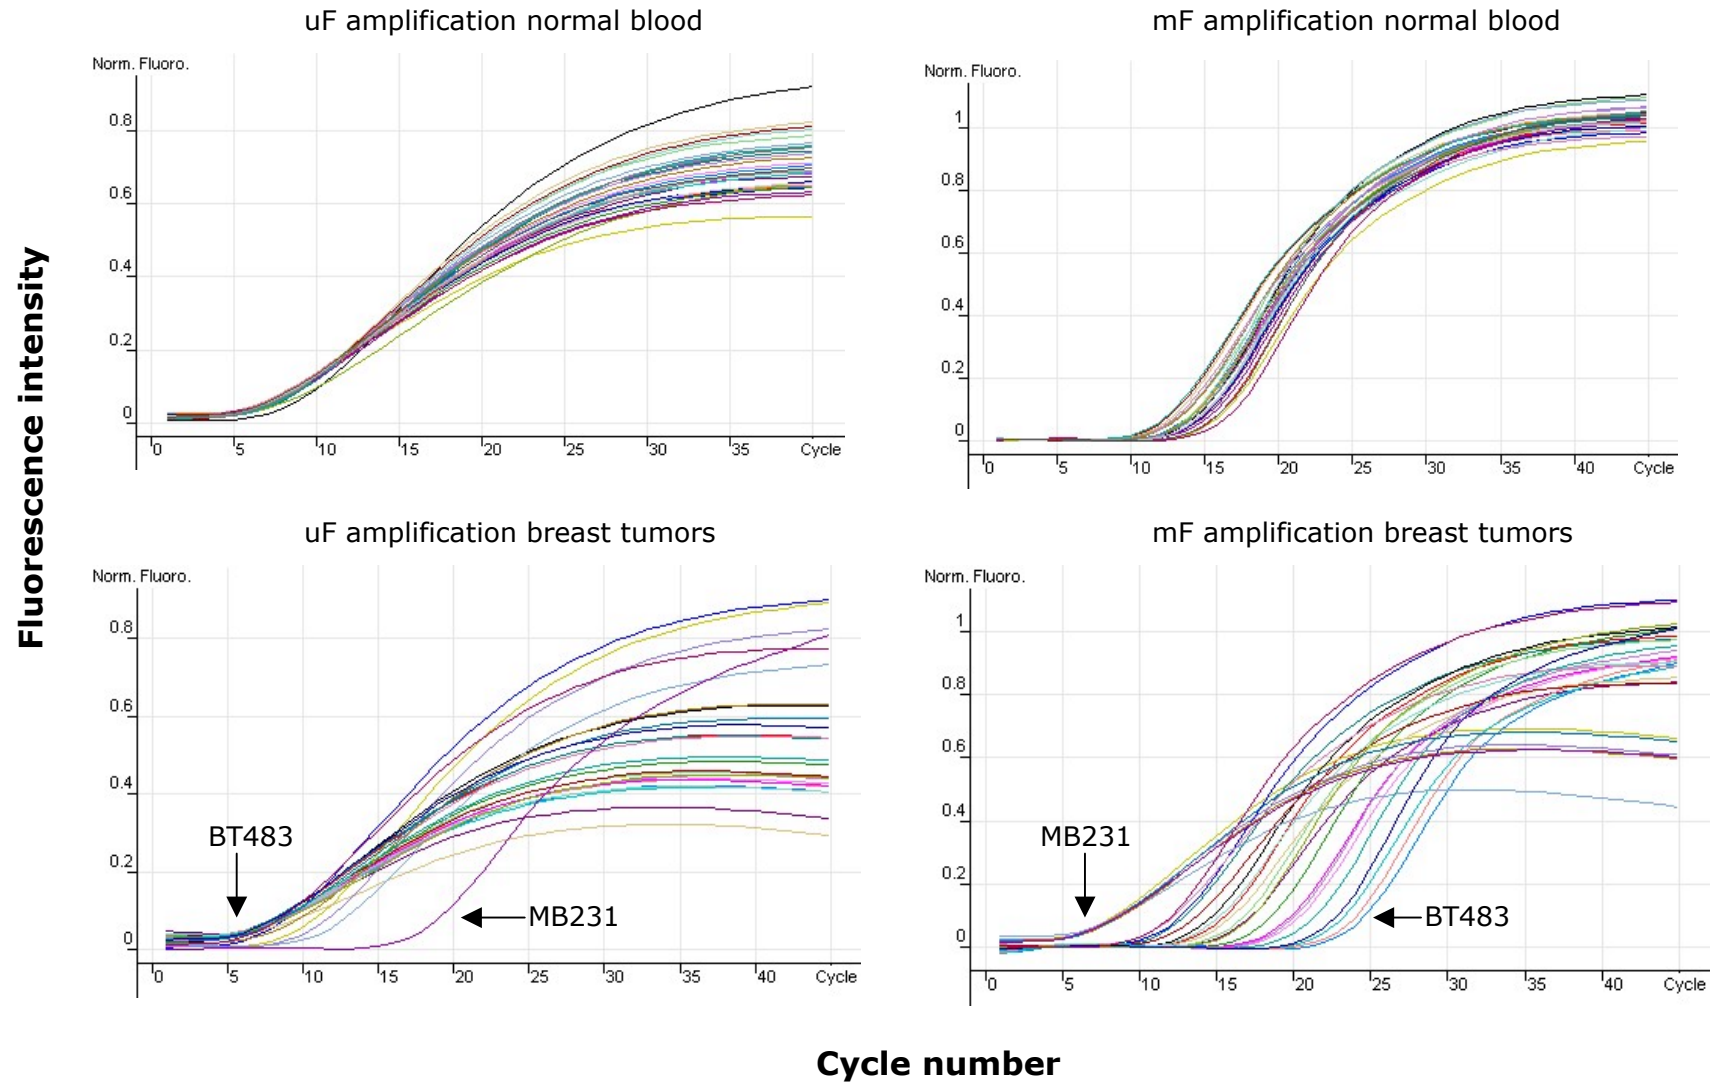

Supplement: 1476-4598-3-22-S3.pdf [file 1476-4598-3-22-S3.pdf]
