# Supplementary material for: Aberrant CBFA2T3B gene promoter methylation in breast tumors
Source: PubMed Central journal article supplement (PMC516017; doi:10.1186/1476-4598-3-22), 2004-08-10

**Additional file 4. Real-time MSP melt curve analysis demonstrating aberrant CBFA2T3B promoter CpG methylation profiles in breast tumor cell lines**

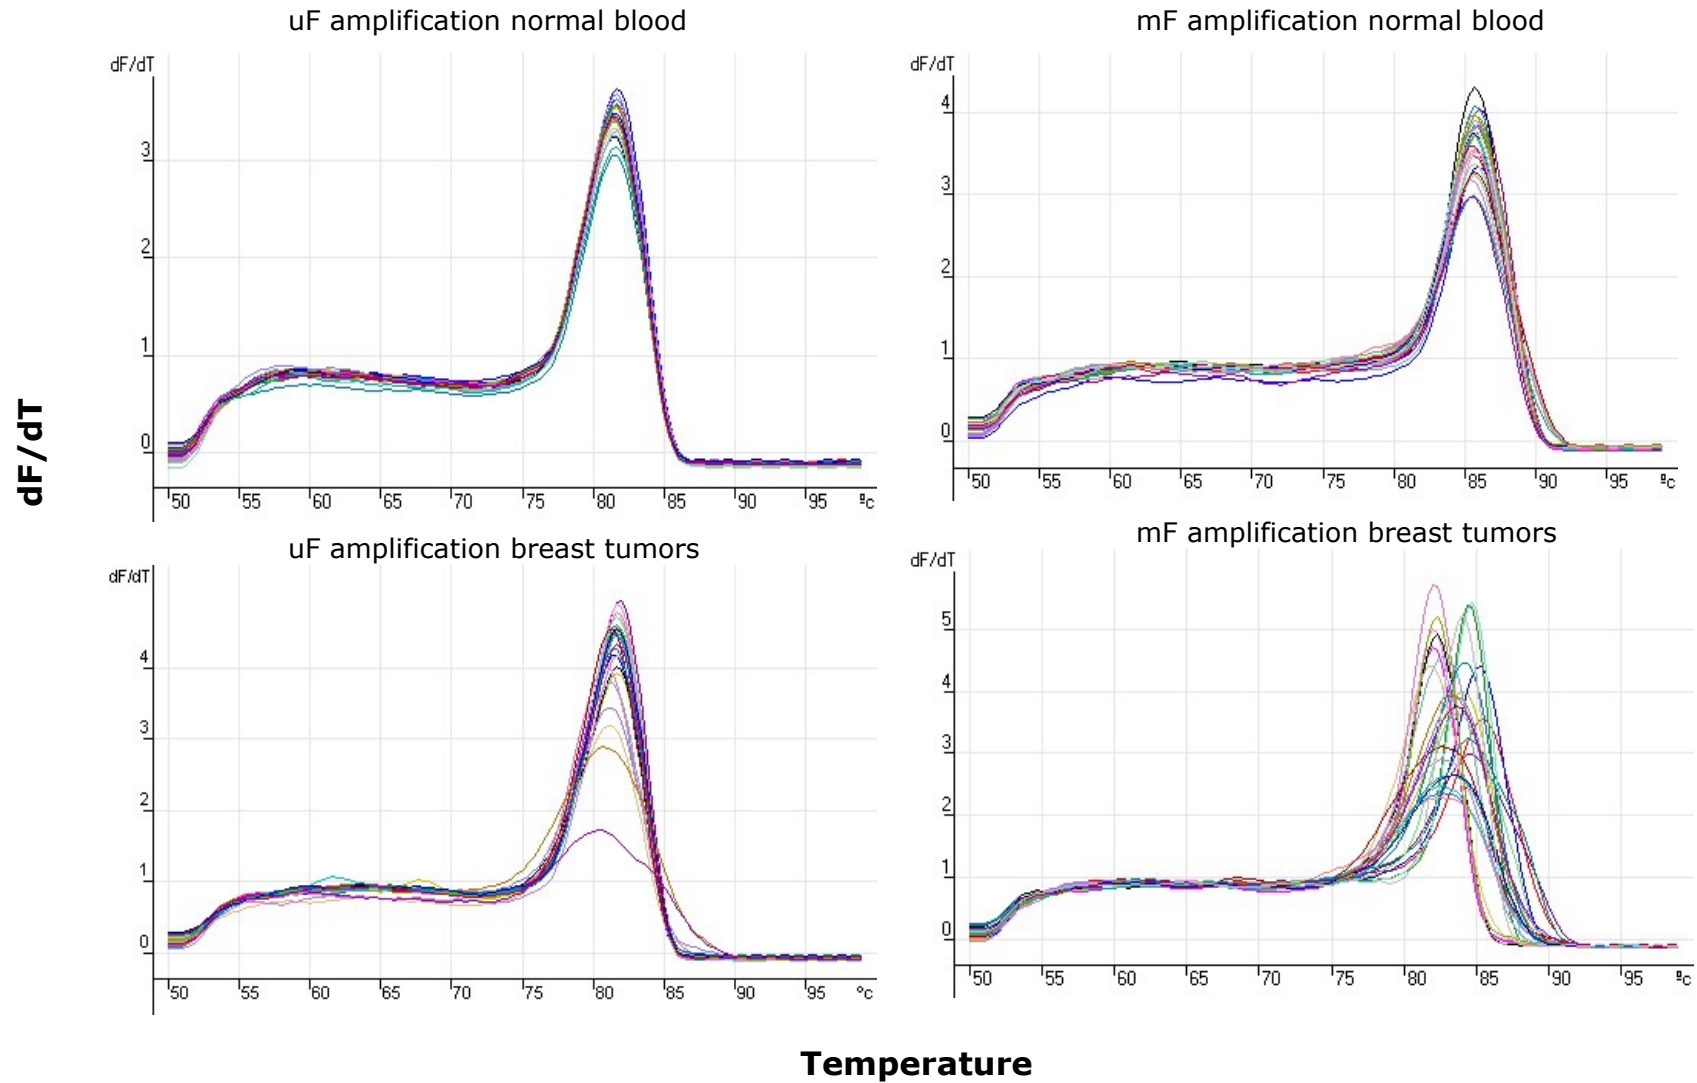

Supplement: 1476-4598-3-22-S4.pdf [file 1476-4598-3-22-S4.pdf]
