# Supplementary material for: Aberrant CBFA2T3B gene promoter methylation in breast tumors
Source: PubMed Central journal article supplement (PMC516017; doi:10.1186/1476-4598-3-22), 2004-08-10

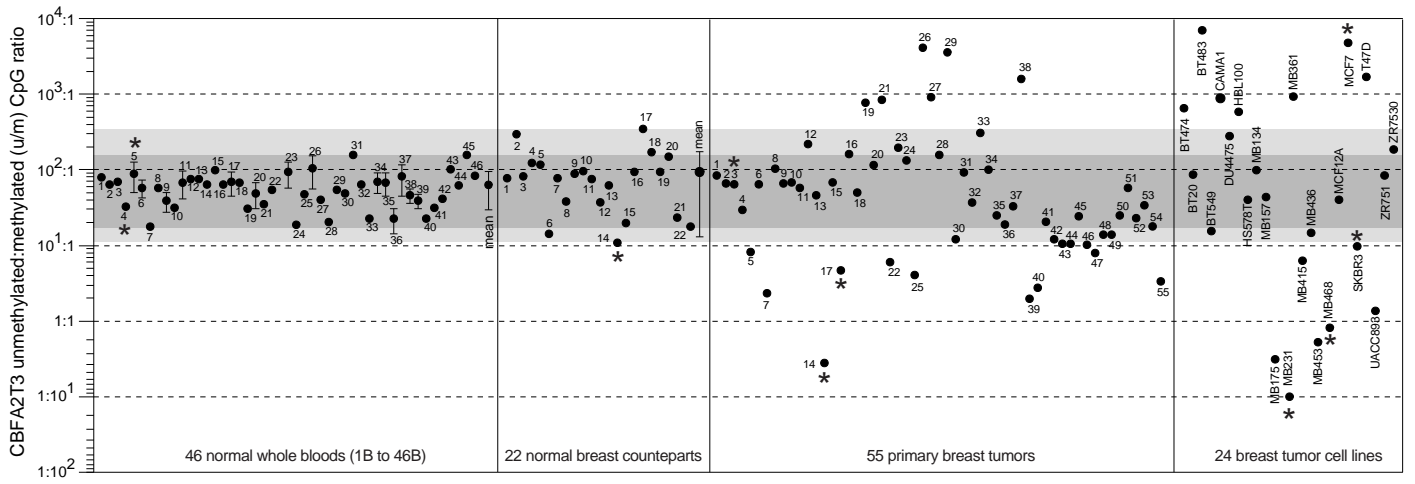

Supplement: 1476-4598-3-22-S6.pdf [file 1476-4598-3-22-S6.pdf]
