# Supplementary material for: Aberrant CBFA2T3B gene promoter methylation in breast tumors
Source: PubMed Central journal article supplement (PMC516017; doi:10.1186/1476-4598-3-22), 2004-08-10
Supplement: 1476-4598-3-22-S7.pdf [file 1476-4598-3-22-S7.pdf]

| Amplicon (bp, °C)   | Forward primer (5'-3')      | Probe (5'-3')                      | Reverse primer (5'-3')     |
|---------------------|-----------------------------|------------------------------------|----------------------------|
| CYPA-1 (114, 60)    | aatgctggacccaacacaaaatg     | FAM-acaccacatgcttgccatccaacct-BHQ1 | cacaatattcatgcctctttcacttt |
| CBFA2T3B (75, 60)   | cagccgcccctgagtcgt          | FAM-cgtcccaccaccctgagccctac-TAMRA  | gcacactcgcgactcgtg         |
| CBFA2T3A (77, 60)   | cgaggaaacacatgcccagt        | FAM-ctgctcctccagcttggtccccgc-TAMRA | cctcctcccaggcagctc         |
| CYPA-2 (355, 60)    | ggcaaatgctggaccaacacaaa     |                                    | ctaggcatggagggaacaaggaa    |
| ATP5A (270, 60)     | ttcggagggaacattggtg         |                                    | tctcaggcctgggggtttt        |
| CBFA2T34/5 (80, 60) | gggcctggtgaactcgacattgac    |                                    | acggccgagagggaagtgtg       |
| SYK (373, 60)       | aggccaatgaccccctcta         |                                    | tgggtctgcctttagtagttt      |
| 1F/1Rm (116, 60)    | cggcgttagaagatagcgcgtagtcg  |                                    | atccgacgaacgacgaacgacg     |
| 1F/1Ru (133, 52)    | tttagtttggtggtgtagaagatagtg | aaaaatccaacaacaacaacaaca           |                            |
| 2F/2Rm (123, 60)    | ttataggcgcggcgttgattcg      |                                    | gaccgcctaaaccatacgaaaactg  |
| 2F/2Ru (135, 52)    | tatagggtggtggttgattg        | aaacacacaaaacaaccctaaaccatacca     |                            |
| 3F/3Rm (198, 60)    | gcggttttaaagttgcgagttcg     |                                    | aacgcgcccctcctacgaaaaacg   |
| 3F/3Ru (188, 52)    | agttgtgggtgtgattgtgtg       |                                    | ccacctcctacaaaaacaacaca    |
| 4F/4Rm (112, 60)    | gcgcgattttgtcgttacgtacg     |                                    | aaaaaaaaatgctccttcgaccgcgg |
| 4F/4Ru (115, 52)    | ggggagtgatgtttgtggtatgatg   | aaaatcactcctcaaccaccaccccca        |                            |
| 1BF/1BR (365, 52)   | ttttgtaggtgatgataaaa        |                                    | acccccactcrcaaaa           |
| 2BF/2BR (310, 52)   | ttgtgygaggtgggtgt           |                                    | acctaaaaaaaaactcccc        |
| 3BF/3BR (346, 52)   | ggtttaaagtgygagtt           |                                    | ctaaaccataccraaaact        |
| 4BF/4BR (477, 52)   | ggggagtttttttaggt           |                                    | acacttacaatcraaaaatcc      |
| mF/2BR (187, 56)    | tttgcgttttttcgcgtcg         |                                    | acctaaaaaaaaactcccc        |
| uF/2BR (187, 52)    | tttgtttttttgtgtg            |                                    | acctaaaaaaaaactcccc        |
